# Supplementary material for: Synthesis, CMC determination, nucleic acid binding and cytotoxicity of a surfactant–cobalt(iii) complex: effect of ionic liquid additive
Source: Royal Society of Chemistry journal article supplement (doi:10.1039/c3nj00832k), 2013-10-11
Supplement: c3nj00832k.pdf [file c3nj00832k.pdf]

## Supplementary information Figure

The manuscript belongs to

Title: Synthesis, CMC determination, Nucleic acid binding and Cytotoxicity of A Surfactant Cobalt(III) complex: Effect of Ionic Liquid Additive

5 Authors: Karupiah Nagaraj, Sankaralingam Arunachalam\*

Journal: New Journal of Chemistry

Date: 26.9.2013

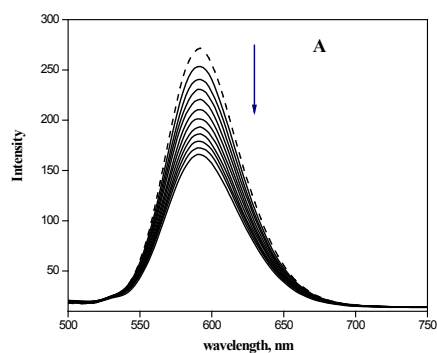

10

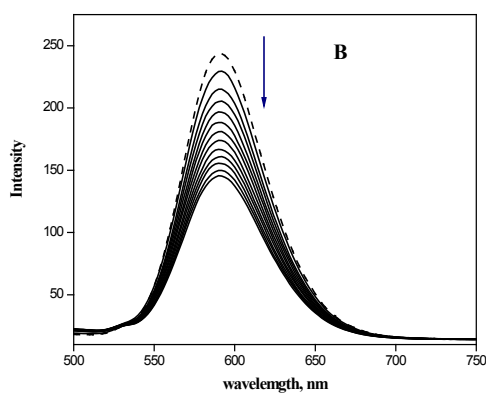

**SIFig 1:** Emission spectra of EB bound to CT DNA in the absence (---) and in the presence (—) of complex (A: Presence of ionic liquids) and (B: Absence of ionic liquids) [EB] =  $2 \times 10^{-5}$  M, [DNA] =  $1 \times 10^{-4}$  M, [Complex] =  $0-1.43 \times 10^{-6}$  and Ionic liquids =  $1 \times 10^{-3}$  M. Arrow shows intensity changes upon increasing the concentration of the complex.

15

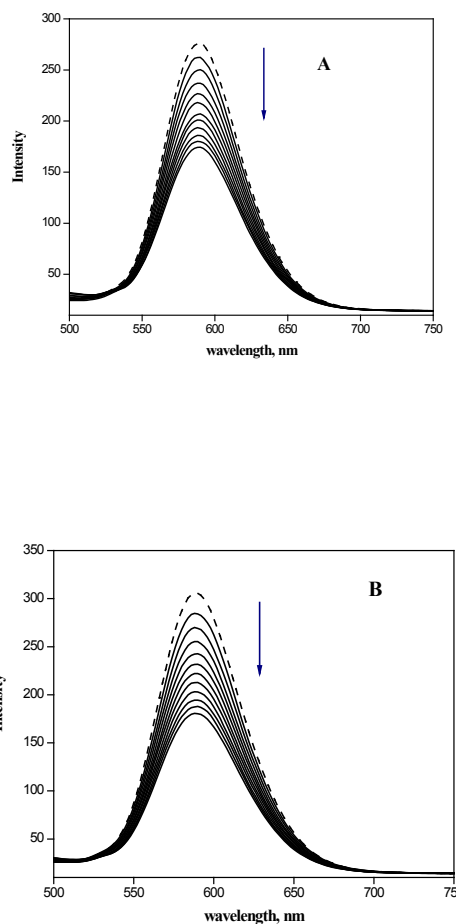

20 **SIFig. 2:** Emission spectra of EB bound to tRNA in the absence (- -) and in the presence (—) of complex (A: Presence of Ionic liquids) and (B: Absence of Ionic liquids) [EB] =  $2 \times 10^{-5}$  M, [RNA] =  $1 \times 10^{-4}$  M, [Complex] =  $0-1.43 \times 10^{-6}$  and Ionic liquids =  $1 \times 10^{-3}$  M. Arrow shows intensity changes upon increasing the concentration of the complex.

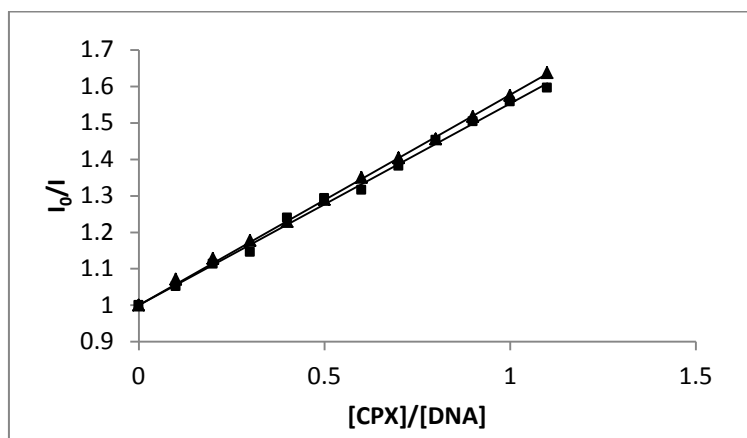

**SIFig. 3:** Fluorescence quenching curves of EB bound to CT DNA by surfactant-cobalt(III) complex Absence of ionic liquids and Presence of ionic liquids

25

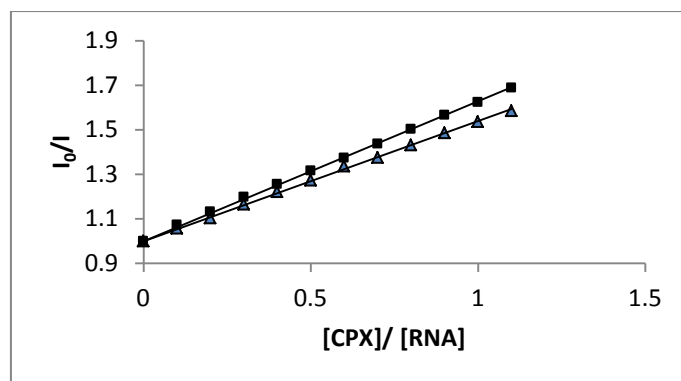

**SI Fig. 4:** Fluorescence quenching curves of EB bound to tRNA by surfactant-cobalt(III) complex Absence of Ionic liquids and Presence of Ionic liquids

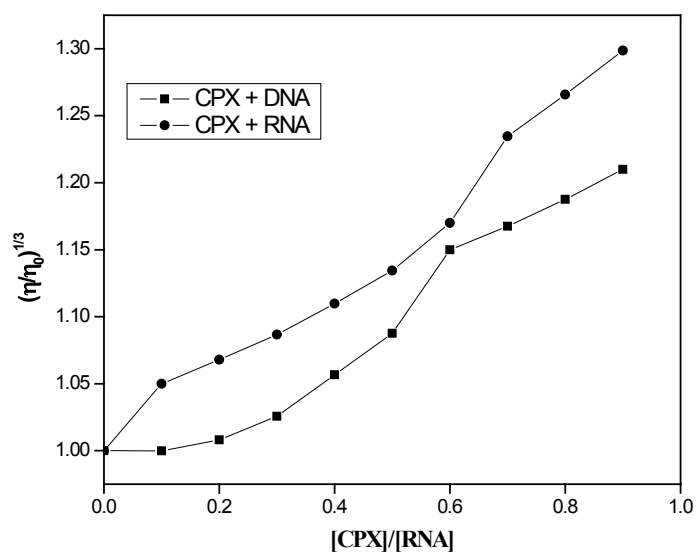

**SI Fig. 5:** Effects of increasing amounts of complex presence of DNA and RNA on the relative viscosities of calf thymus DNA at 30.0 (±0.1) °C.

30

35
